# Supplementary material for: Adsorptive stripping voltammetric determination of dicyclomine hydrochloride at a glassy carbon electrode modified with silver decorated Fe3O4nanocubes in pharmaceutical and biological samples
Source: Royal Society of Chemistry journal article supplement (doi:10.1039/c8ay00009c), 2018-01-01
Supplement: c8ay00009c1.pdf [file c8ay00009c1.pdf]

## Supplementary information

**Adsorptive stripping voltammetric determination of dicyclomine hydrochloride at glassy carbon electrode modified with silver decorated Fe<sub>3</sub>O<sub>4</sub> nanocubes in pharmaceutical and biological samples**

**Chaitali R. Rawool, Anuja S. Rajpurohit, Ninad S. Punde, Ashwini K. Srivastava\***

*Department of Chemistry, University of Mumbai, Vidyanagari, Santacruz (East), Mumbai -400 098, India*

\* Corresponding Author. Tel.: +91 22 26543570

Email: [aksrivastava@chem.mu.ac.in](mailto:aksrivastava@chem.mu.ac.in), [akschbu@yahoo.com](mailto:akschbu@yahoo.com)

### Figure captions:

**Fig.S1** A bar graph for effect of various supporting electrolytes of pH 7.5 on peak current ( $I_p$ ) of  $8 \times 10^{-4}$  M DcCl at GCE employing DPV

**Fig.S2** Comparison of response of  $8 \times 10^{-4}$  M DcCl in BR buffer (0.04 M) of pH 7.5 at  $\text{Fe}_3\text{O}_4/\text{Ag}/\text{GCE}$  by LSV (—), DPV (---) and SWV (----)

**Fig.S3** Effect of accumulation potential ( $E_{\text{acc}}$ ) on peak current ( $I_p$ ) of  $8 \times 10^{-4}$  DcCl at  $\text{Fe}_3\text{O}_4/\text{Ag}/\text{GCE}$  employing AdSSWV

**Fig.S4** Effect of accumulation time ( $t_{\text{acc}}$ ) on peak current ( $I_p$ ) of  $8 \times 10^{-4}$  DcCl at  $\text{Fe}_3\text{O}_4/\text{Ag}/\text{GCE}$  employing AdSSWV

### Table captions:

**Table S1:** Precision and Bias of assay for standard DcCl solution by the proposed voltammetric procedure (n= 5)

**Table S2:** Determination of DcCl in pharmaceutical formulations by proposed method

**Figures:**

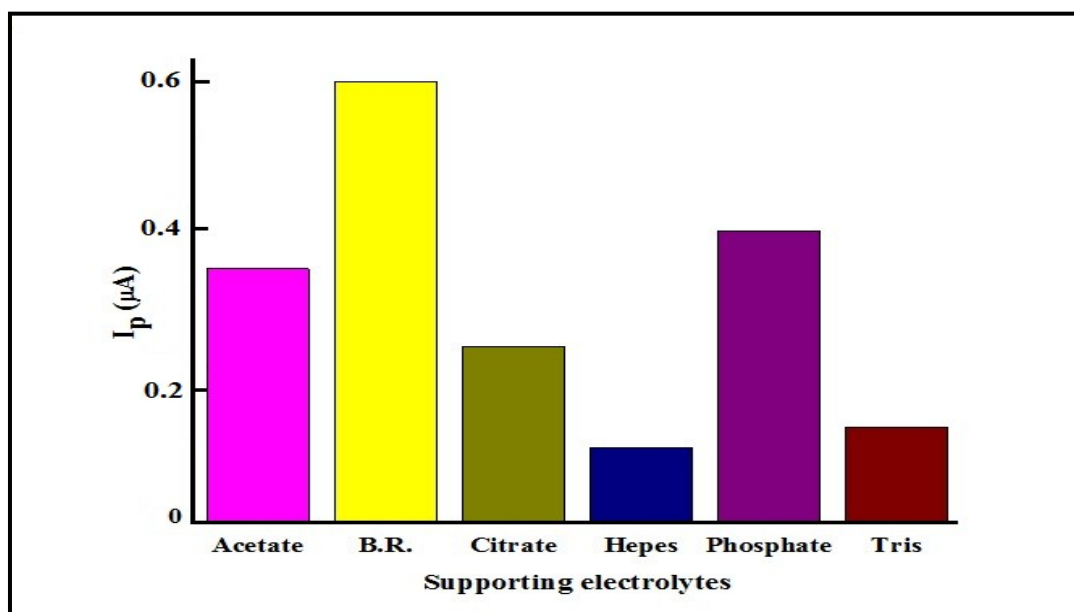

**Fig.S1**

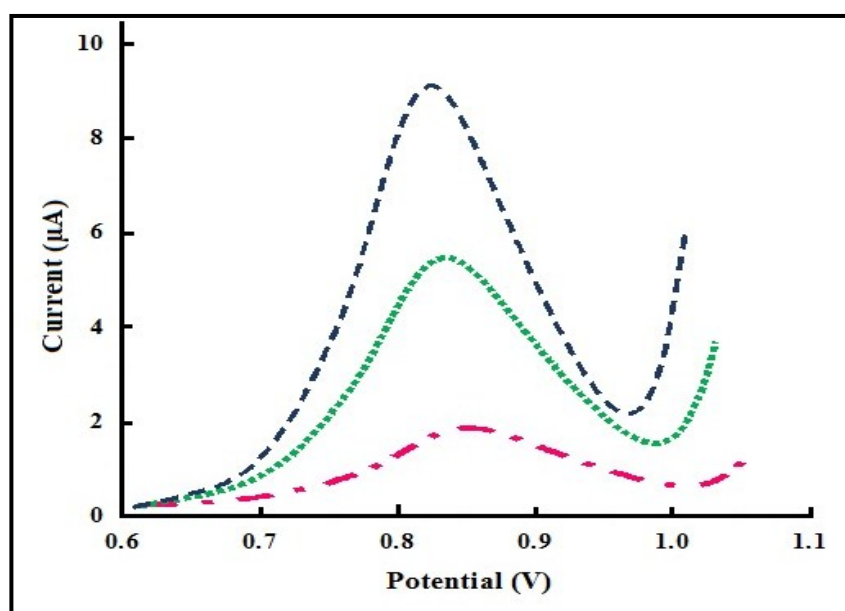

**Fig.S2**

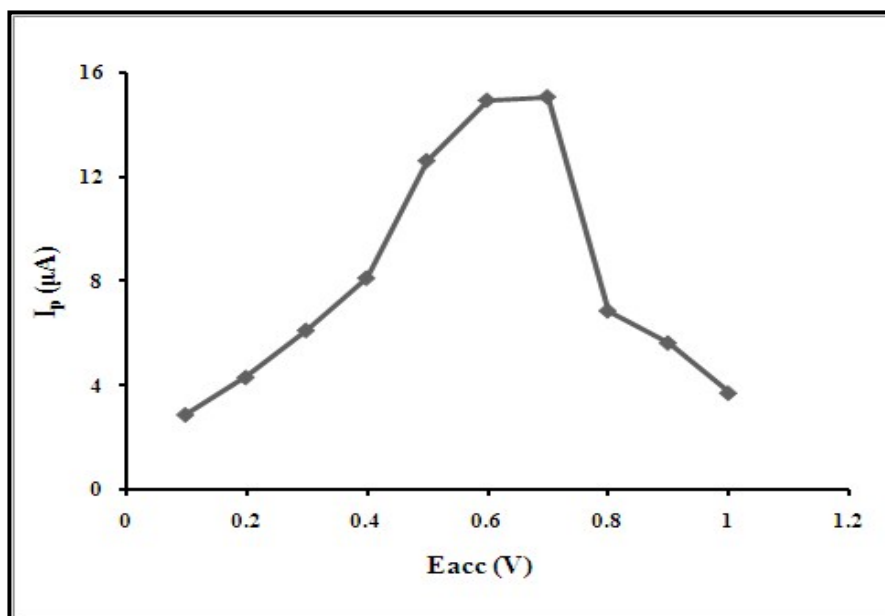

Fig.S3

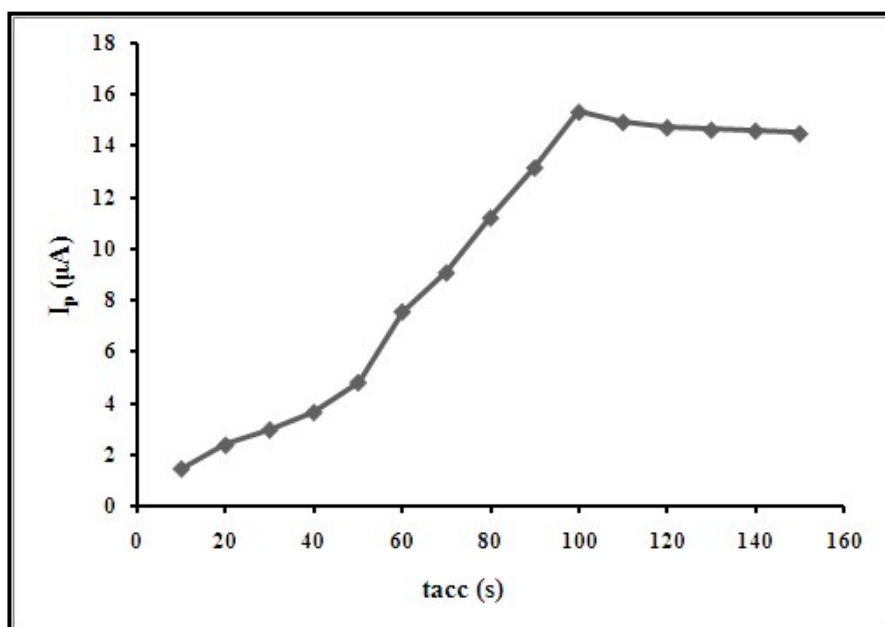

Fig.S4

## Tables:

**Table S1:**

| Molecule    | Concentration<br>(taken) ( $10^{-5}$ M) | Concentration<br>(found) ( $10^{-5}$ M) | Recovery<br>(%) (n = 5) | Bias (%) | Precision %<br>R.S.D<br>(n = 5) |
|-------------|-----------------------------------------|-----------------------------------------|-------------------------|----------|---------------------------------|
| Intra - day |                                         |                                         |                         |          |                                 |
| DcCl        | 2.5                                     | 2.48                                    | 99.2                    | 0.81     | 1.78                            |
| Inter - day |                                         |                                         |                         |          |                                 |
|             | 3.6                                     | 3.56                                    | 98.8                    | 1.12     | 2.24                            |

**Table S2:**

| Sample      | DcCl                                                    |                                                                             |
|-------------|---------------------------------------------------------|-----------------------------------------------------------------------------|
|             | Amount of DcCl in the tablet<br>(mg) and injection (mL) | Amount of DcCl determined<br>by proposed method (mg) $\pm$<br>% RSD (n = 5) |
| MEFTAL-SPAS | 10.0                                                    | 9.98 $\pm$ 0.42                                                             |
| Beralgun NU | 20.0                                                    | 19.91 $\pm$ 0.16                                                            |
| Cyclopam    | 10.0                                                    | 9.95 $\pm$ 0.59                                                             |
